# Supplementary material
Source: MDPI journal article supplement (https://www.mdpi.com/2076-3417/14/4/1522)
Supplement: s1 [file s1]

## Supplementary Data

**Table S1. Retention time and kovats index of the identified volatile aromatic compounds.**

| RT. TIME | COMPOUND                                                | Kovats Index |
|----------|---------------------------------------------------------|--------------|
| 7.19     | Hexanoic acid, ethyl ester                              | 1204.91      |
| 8.53     | Acetic acid, hexyl ester                                | 1246.66      |
| 11.64    | 1-Hexanol                                               | 1343.57      |
| 15.39    | Octanoic acid, ethyl ester                              | 1460.43      |
| 15.78    | Acetic acid                                             | 1472.58      |
| 17.81    | 1-Hexanol, 2-ethyl-                                     | 1535.84      |
| 18.62    | Propanoic acid                                          | 1561.08      |
| 21.34    | Propanoic acid, 2-methyl-                               | 1645.84      |
| 23.39    | Butanoic acid                                           | 1709.56      |
| 24.7     | Decanoic acid, ethyl ester                              | 1750.54      |
| 25.85    | Pentanoic acid, 3-methyl-                               | 1786.37      |
| 26.02    | Butanedioic acid, diethyl ester                         | 1791.67      |
| 26.82    | Ethyl trans-4-decenoate                                 | 1816.60      |
| 26.85    | Ethyl 9-decenoate                                       | 1817.53      |
| 33.33    | Hexanoic acid                                           | 2019.46      |
| 35.15    | Phenylethyl Alcohol                                     | 2076.17      |
| 38.24    | 2-Hexenoic acid                                         | 2172.46      |
| 41.89    | Octanoic acid                                           | 2286.19      |
| 45.86    | Nonanoic acid                                           | 2409.90      |
| 49.69    | n-Decanoic acid                                         | 2529.25      |
| 51.69    | 9-Decenoic acid                                         | 2591.57      |
| 53.15    | Ethyl hydrogen succinate                                | 2637.07      |
| 55.63    | Undecylenic acid                                        | 2714.35      |
| 56.94    | Dodecanoic acid                                         | 2755.17      |
| 58.03    | 1,2-Benzenedicarboxylic acid, bis 2-methylpropyl) ester | 2789.13      |
| 60.57    | Behenic alcohol                                         | 2868.28      |
| 64.19    | Tetradecanoic acid                                      | 2981.08      |
| 67.85    | Pentadecanoic acid                                      | 3095.13      |
| 68.07    | Hexanedioic acid, bis 2-ethylhexyl) ester               | 3101.99      |
| 71.52    | n-Hexadecanoic acid                                     | 3209.49      |
| 72.49    | Palmitoleic acid                                        | 3239.72      |
| 74.97    | Octadecanoic acid                                       | 3317.00      |
| 79.24    | Oleic Acid                                              | 3450.06      |
| 80.65    | 9,12-Octadecadienoic acid (Z,Z)-                        | 3493.99      |
| 81.92    | Benzoic acid, 4-(methylamino)-                          | 3533.57      |
| 82.67    | 3,3,6-Trimethyl-1,4-heptadien-6-ol                      | 3556.94      |
| 82.96    | Eicosanoic acid, isopropyl ester                        | 3565.98      |
| 83.7     | Eicosanoic acid                                         | 3589.04      |
| 84.75    | Tryptophol                                              | 3621.75      |
| 85.52    | Didecyl phthalate                                       | 3645.75      |
| 89.69    | Docosanoic acid                                         | 3775.69      |
| 92.79    | Octadecanoic acid, 10-oxo-, methyl ester                | 3872.29      |
| 92.99    | 9-Oxo-1,17-heptadecanedioic acid                        | 3878.52      |
